# Supplementary material for: Modelling of atmospheric concentrations of fungal spores: a two-year simulation over France using CHIMERE
Source: Copernicus journal article supplement (doi:10.5194/egusphere-2024-698), 2024-04-16
Supplement: Supplementary file [file egusphere-2024-698-CC1-supplement.pdf]

# Modelling of atmospheric concentrations of fungal spores: a two-year simulation over France using CHIMERE.

Matthieu Vida<sup>1</sup>, Gilles Foret<sup>2</sup>, Guillaume Siour<sup>2</sup>, Florian Couvidat<sup>3</sup>, Olivier Favez<sup>3,4</sup>, Gaelle Uzu<sup>5</sup>, Arineh Cholakian<sup>6</sup>, Sébastien Conil<sup>7</sup>, Matthias Beekmann<sup>1</sup> and Jean-Luc Jaffrezo<sup>5</sup>.

<sup>1</sup>Université Paris Cité and Univ Paris Est Creteil, CNRS, LISA, F-75013 Paris, France

<sup>2</sup>Univ Paris Est Creteil and Université Paris Cité, CNRS, LISA, F-94010 Créteil, France

<sup>3</sup>Institut National de l'Environnement Industriel et des Risques, INERIS, F-60550 Verneuil-en-Halatte, France

<sup>4</sup>Laboratoire Central de Surveillance de la Qualité de l'air, LCSQA, F-60550 Verneuil-en-Halatte, France

<sup>5</sup>Institut des Géosciences de l'Environnement, IGE, UGA, CNRS, IRD, G-INP, INRAE, F-38000 Grenoble, France

<sup>6</sup>Laboratoire de Météorologie Dynamique (LMD), Ecole Polytechnique, IPSL Research University, Ecole Normale Supérieure, Université Paris-Saclay, Sorbonne Universités, UPMC Université Paris 06, CNRS, Route de Saclay, F-91128 Palaiseau, France

<sup>7</sup>ANDRA DISTEC/EES Observatoire Pérenne de l'Environnement, F-55290, Bure, France

*Correspondence:* Gilles Foret ([gilles.foret@lisa.ipsl.fr](mailto:gilles.foret@lisa.ipsl.fr)) & Gaelle Uzu ([gaelle.uzu@ird.fr](mailto:gaelle.uzu@ird.fr))

## Abstract

Fungal spore organic aerosol emissions have been recognised as a significant source of particulate matter as PM<sub>10</sub>; however, they are not widely considered in current air quality models. In this work, we have implemented the parameterisation of fungal spore organic aerosol (OA) emissions introduced by Heald and Spracklen (2009) (H&S) and further modified by Hoose et al. (2010) in the CHIMERE regional chemistry-transport model. This simple parameterisation is based on two variables, leaf area index (LAI) and specific humidity. We have validated the geographical and temporal representativeness of this parameterisation on a large scale by using yearly polyol observations and primary biogenic organic aerosol factors from PMF analysis at 11 French measurement sites. For a group of sites in northern and eastern France, the seasonal variation of fungal spore emissions, displaying large summer and small winter values, is correctly depicted. However, the H&S parameterisation fails to capture fungal spore concentrations for a smaller group of Mediterranean sites with less data availability both in terms of absolute values as well as seasonal variability, leading to strong negative biases especially during the autumn and winter seasons occur. Two years of CHIMERE simulations with the H&S parameterisation have shown a significant contribution of fungal spore OA to PM<sub>10</sub> mass, lower than 10 % during winter, and reaching up to 20 % during summer in high emission zones, especially over large forested areas. In terms of contribution to organic matter (OM) concentrations, the simulated fungal spore contribution in autumn is as high as 40 % and reaches at most 30 % of OM for other seasons. As a conclusion, the fungal spore OA contribution to total OM concentrations is shown to be substantial enough to be considered as a major PM<sub>10</sub> fraction and ~~shall should~~ then be included in state-of-the-art chemistry transport models. ~~The H&S parameterisation shows satisfactory results over northern and eastern France, but may underestimate concentrations for Mediterranean areas that may indicate missing factors influencing emissions or a missing source of spores.~~

## 48 1. Introduction

50 ~~Modelling of the organic matter (OM) fraction of PM<sub>10</sub> chronically~~  
52 ~~underestimates in situ observations (Ciarelli et al., 2016; Pai et al., 2020). This~~  
54 ~~underestimation can be attributed to several causes such as the complexity of the~~  
~~organic matter composition, which is not yet fully known, incomplete emission~~  
~~inventories or their inherent uncertainties, and poorly parametrised atmospheric~~  
~~chemical transformations.~~

56 Modelling of the organic matter (OM) fraction of PM<sub>10</sub> with chemical transport  
58 models can be complex due to the varied composition of organic matter, which is not  
yet fully known, incomplete emission inventories or their inherent uncertainties, and  
poorly parameterised atmospheric chemical transformations.

60 It is therefore important to assess whether the primary source of organic  
62 aerosol, currently not considered in many models, can help to improve atmospheric  
64 aerosol modelling. Primary biogenic organic aerosols (PBOA) are mainly composed of  
66 microorganisms such as bacteria, fungi, fungal or bacterial spores, pollens or viruses  
68 and biological fragments such as plant debris or microbes (Després et al., 2012;  
70 Fröhlich-Nowoisky et al., 2016; Jaenicke et al., 2007). Their size varies from less than  
72 0.3 µm for viruses to about 100 µm for pollens (Després et al., 2012; Jones and  
74 Harrison, 2004; Shaffer and Lighthart, 1997). When looking at atmospheric particles  
76 with an aerodynamic diameter of less than 2.5 or 10 µm (which are the fractions  
78 routinely measured and studied for health risk assessment), it is possible to find  
viruses, bacteria (agglomerated or not) and spores; however spores, when produced  
by fungi, represent the major fraction in terms of mass (Elbert et al., 2007).

72 More specifically, fungal spores are emitted directly into the atmosphere during  
74 the fungal reproduction process when temperature and humidity conditions are  
76 favourable, but their emission can also be triggered by wind and rain (Elbert et al.,  
78 2007; Huffman et al., 2013; Jones and Harrison, 2004). Previous studies estimated  
that fungal spores can contribute to around 5 % and 10 % of the mass of respectively  
PM<sub>10</sub> and organic carbon, in urban and suburban areas (Bauer et al., 2002, 2008b). In  
specific environments such as tropical forests, the contribution of fungal spores can  
represent 45 % of the PM<sub>10</sub> mass (Elbert et al., 2007).

80 Fungal spores are susceptible to cause major health problems such as asthma,  
82 pulmonary obstruction, tuberculosis, meningitis and legionellosis (Douwes et al., 2003;  
Eduard et al., 2012; Fröhlich-Nowoisky et al., 2016; Ghosh et al., 2015; Pearson et al.,  
84 2015; Samaké et al., 2017). Some studies on PBOA have shown that aerosols emitted  
86 directly by fungi in the form of spores contribute significantly to the oxidative potential  
of aerosols (Samaké et al., 2017). Moreover, based on a positive matrix factorisation  
88 (PMF) analysis, Weber et al. (2021) derived a primary biogenic factor based on a large  
data set of speciated PM<sub>10</sub> aerosol measurements over France, including polyol  
90 measurements as a tracer for fungal spores. They found a high intrinsic oxidative  
potential by dithiothreitol (DTT) for this factor, equal to that of biomass burning, but  
lower than that of primary traffic emissions.

92 Literature review shows several parameterisations suitable for use of modelling  
primary biogenic aerosols emissions from fungal spores in the PM<sub>10</sub> size range in  
chemistry transport models. Samaké et al. (2019a) identified the parameters  
94 responsible ~~the variability~~ for up to 82 % of the annual variability of polyols as a tracer  
of fungal spores for a temperate latitude site in an alpine environment, using multi-

96 linear approaches. These variations were mainly explained by the mean night-time  
98 temperature (54 %) and LAI (37 %), and to a lesser extent by the atmospheric humidity  
100 (3 %) and the wind speed (2 %). The combined factor of LAI and wind speed explains  
102 the remaining variability (4 %). A first parameterisation for the treatment of fungal  
104 scores in atmospheric models was proposed by Heald and Spracklen (2009) (H&S)  
106 and modified by Hoose et al. (2010). It estimates fungal spore emissions as a linear  
108 function of leaf area index (LAI) and specific humidity. In this formulation, the LAI is a  
110 proxy for the vegetation density and the specific humidity is a proxy for the water  
112 availability, but is also related temperature. The parameterisation proposed by Sesartic  
and Dallafior (2011) (S&D) suggests a different approach by varying emissions as a  
function of soil types, not relying on LAI, and therefore removing the seasonality  
inherently present in the H&S parameterisation. Hummel et al. (2015) compared these  
parameterisations across Europe and developed a new statistical model, based on the  
H&S parameterisation using LAI and specific humidity, to also include a linear  
dependence with temperature, and a threshold below which emissions are assumed  
to be zero.

114 In Hummel et al. (2015), the concentrations simulated with three  
116 parameterisations of H&S, S&D and Hummel were compared to measurements of  
118 fluorescent biological aerosol particles (FBAP) at four sites in several parts of Europe  
(Germany, Finland, UK, Ireland) for almost weekly time periods in July, August and  
120 October of 2010. This comparison was carried out using 1,536 hourly data points, [that](#)  
[most 1,200](#) of which came from the German [\(600\)](#) and Finnish [\(600\)](#) stations, ~~each~~  
~~with 600 data points~~. At these two sites, one week in July, one week in August and 10  
122 days in September were measured, unlike the UK and Irish sites, where the data was  
124 taken only for August 2010. FBAP measurements are taken as a proxy for fungal spore  
126 emissions. By construction, the S&D parameterisation does not reproduce the  
128 observed daily and seasonal variability, while it is known that fungal spore emissions  
display a general summer maximum across Europe (Samaké et al., 2019a, b). On the  
contrary, the H&S and Hummel parameterisations include these temporal variations  
and therefore show better correlations with measured concentrations ( $R = 0.43$ )  
compared to the S&D approach ( $R = -0.05$ ). The parameterisation by Hummel et al.  
(2015) showed a lower normalised mean bias (NMB = -43 %) compared to the H&S  
one (NMB = -44 %).

130 As fungal spores make a significant contribution to  $PM_{10}$  and are rarely included  
132 in chemistry transport models (CTM), the aim of our study is to integrate them into the  
state-of-the-art Chemistry Transport Model CHIMERE (Menuet et al., 2021), to evaluate  
134 the model performance with field measurements, and to infer the spatio-temporal  
136 variability of their occurrence. This could lead to improved modelling of  $PM_{10}$   
concentrations, of organic matter, and of other pollutants such as secondary biogenic  
compounds or even oxidative potential. This study will focus on France, displaying one  
138 of the largest database of chemically speciated PM measurements in Europe (Favez  
et al., 2021). Interestingly, France has a wide range of climatic variability (oceanic,  
140 semi-oceanic, continental, mountainous, Mediterranean), making it possible to  
compare fungal spore modelling results under various climatic conditions. To assess  
142 the modelling of fungal spores, measurements of polyols were used, specifically  
mannitol and arabitol, since many studies indicate that they are specific tracers of this  
144 PBOA fraction (Bauer et al., 2008a; Gosselin et al., 2016; Samaké et al., 2019a).

146 Furthermore, we compared our CTM results to the concentrations of organic matter  
ascribed to this primary biogenic source using the receptor model Positive Matrix  
Factorisation (PMF) in previous work.

## 150 2. Material & methods

### 152 2.1. Observations

#### 152 2.1.1. PM<sub>10</sub> and Organic matter measurements

154 The PM<sub>10</sub> mass concentration data have been obtained from continuous  
measurements performed by French regional air quality monitoring networks (AQMN).  
156 ~~A total of 699 air quality stations performed measurements in metropolitan France  
during the period of the study, restricted to 2013 and 2014, including fixed and mobile  
158 stations.~~ These observations have been achieved by AQMN using two types of  
automated analysers during this period: tapered element oscillating microbalances  
160 equipped with filter dynamic measurement systems (TEOM-FDMS, Thermo Scientific),  
and beta radiation absorption analysers (Met One BAM 1020 and ENVEA MP101M).  
162 These measurements have been conducted in accordance with standard procedures  
described in CSN EN 16450. As described by Favez et al. (2021), the aim of the  
164 aerosol characterisation program (CARA) is to develop knowledge of the chemical  
composition and contribution of atmospheric particle sources. This work is enriched by  
166 research programmes, with data from some of them being used in this study. In CARA  
and other programs, the chemical analysis of (PM<sub>10</sub>) filter samples has been performed  
168 following relevant European standard methods. Briefly, for datasets used herein,  
organic carbon was measured by thermo-optical analysis using the EUSAAR2 protocol  
170 (Cavalli et al., 2010). Sugars were measured by liquid chromatography using pulsed  
amperometric detection (Verlhac et al., 2013; Yttri et al., 2015). The measurement  
172 protocols have been detailed in previous studies (Samaké et al., 2017, 2019a, b;  
Weber et al., 2021). The analysed species include mannitol and arabitol, which  
174 currently make up for a large fraction of organic sugars (Elbert et al., 2007) and are  
used as a tracer for fungal spore emissions.

176 In summary, for the datasets used in the present study, PM<sub>10</sub> organic matter  
observations were performed at 13 different stations for a total of 2,227 daily filter  
178 samples, including 1,497 data on polyols on 11 sites. The locations of these sites are  
illustrated in Figure 1, while Table 1 provides details on the number of data points  
180 available per station and their temporality.

#### 182 2.1.2. OC apportionment based on filter samples

184 Positive Matrix Factorisation (PMF) is one of the most widely used techniques  
for identifying factors contributing to aerosol concentrations using ~~field~~ [online and](#)  
186 [offline](#) measurements ~~s\_data~~ (Belis et al., 2020; Hopke et al., 2020; Karagulian et al.,  
2015; Paatero and Tapper, 1994). This receptor model commonly uses off-line  
188 chemical speciation measured on filters and factor-specific tracers as input data. The  
correlation matrices allow the identification of the species co-emitted with the tracers  
190 and thus determine the contribution of the factors to the PM<sub>10</sub> concentrations. For this  
study, PMF analysis were previously performed with a harmonised methodology  
192 (Weber et al., 2021), providing source apportionment results for a total number of 842

daily ~~samples collected data~~ at 7 ~~French~~ sites from early 2013 to the end of 2014. PMF results at all sites include a factor which can be attributed to PBOA because of the large concentrations of the two polyols in this factor, representing more than 90 % of ~~them~~ the polyols total mass in this factor (Samaké et al., 2019a). The organic carbon of the primary biogenic PMF was multiplied by a factor of 1.8 to obtain the organic matter concentrations of this PMF factor (OMpb) (Favez et al., 2010; Petit et al., 2015). However, this PBOA factor may also contain biogenic secondary organic aerosols (BSOA) since it is sometimes associated with BSOA tracers, such as 3-MBTCA (resulting from  $\alpha$ -pinene oxidation) or 2-MTs (resulting from oxidation of isoprene) (Borlaza et al., 2021). Therefore, we propose here to use the PBOA factor as an upper boundary for fungal spore concentrations (see section 3.2).

**Table 1 : Summary of ~~organic matter and polyols~~ the number of daily filters analysed filter-based observations for polyols as well as OM from primary biogenic factor derived from PMF analysis (OMpb) available for this study over the years 2013 and 2014 at different French sites (within the PM<sub>10</sub> fraction). The measurement period and geographical coordinates (latitude ; longitude ; altitude) are also indicated.**

| Stations        | Coordinates<br>(lat ; lon ; alt)     | Measurement period      | OMpb | Polyols |
|-----------------|--------------------------------------|-------------------------|------|---------|
| Aix-en-Provence | 43.53 ; 5.44 ; <a href="#">192 m</a> | 18.07.2013 – 13.07.2014 | 56   | 117     |
| Andra-OPE       | 48.55 ; 5.46 ; <a href="#">386 m</a> | 01.01.2013 – 29.12.2014 | /    | 98      |
| Grenoble        | 45.16 ; 5.74 ; <a href="#">219 m</a> | 02.01.2013 – 29.12.2014 | 237  | 238     |
| Lens            | 50.44 ; 2.83 ; <a href="#">47 m</a>  | 05.04.2013 – 26.09.2014 | 167  | 138     |
| Marseille       | 43.30 ; 5.39 ; <a href="#">73 m</a>  | 01.06.2014 – 31.12.2014 | /    | 95      |
| Nice            | 43.70 ; 7.29 ; <a href="#">11 m</a>  | 04.06.2014 – 31.12.2014 | 77   | 89      |
| Nogent-sur-Oise | 49.28 ; 2.48 ; <a href="#">28 m</a>  | 02.01.2013 – 31.12.2014 | 155  | 220     |
| Port-de-Bouc    | 43.40 ; 4.98 ; <a href="#">3 m</a>   | 01.06.2014 – 31.12.2014 | 79   | 80      |
| Revin           | 49.91 ; 4.63 ; <a href="#">394 m</a> | 02.01.2013 – 26.09.2014 | /    | 168     |
| Roubaix         | 50.71 ; 3.18 ; <a href="#">31 m</a>  | 20.01.2013 – 08.09.2014 | /    | 159     |
| Strasbourg      | 48.59 ; 7.74 ; <a href="#">139 m</a> | 02.04.2013 – 31.12.2014 | 71   | 95      |

210

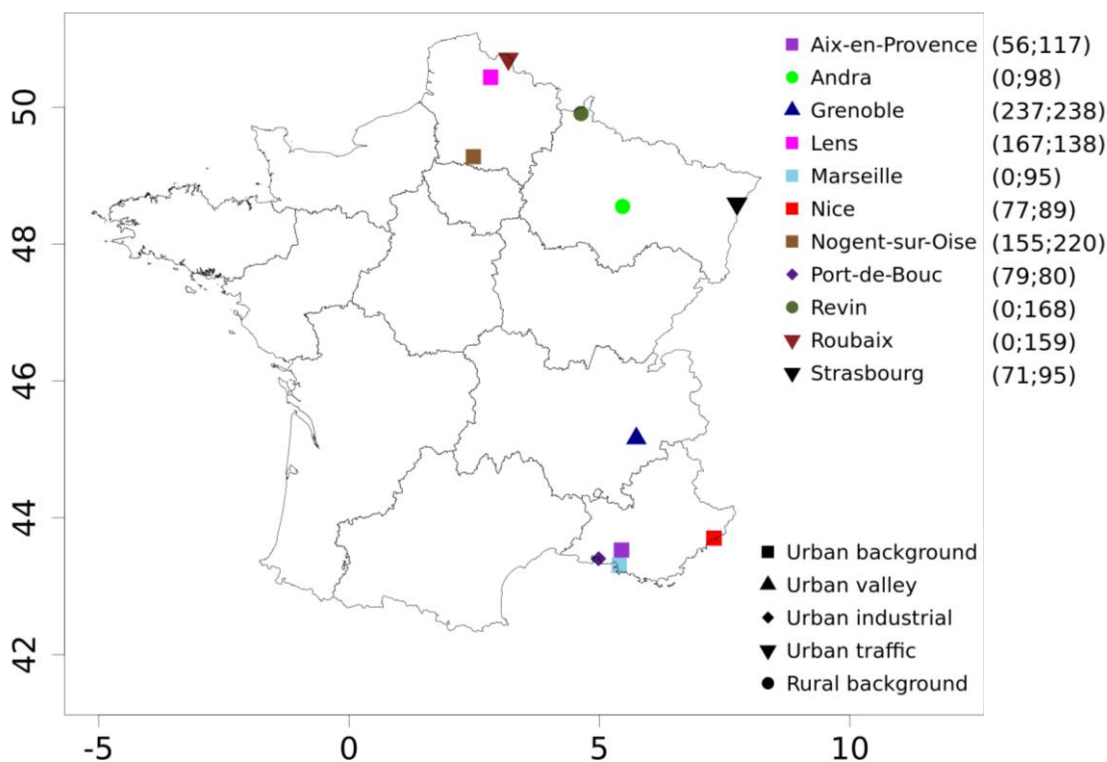

Figure 1 : Location and type of sites for PM<sub>10</sub> polyols measurements from filters as well as organic matter from the primary biogenic PMF factor (OMpb) over the years 2013 and 2014. The number of daily data use at each site is given in brackets, starting with the number of data for OMpb and then for polyols.

212

214

Sites are distributed over different geographical areas (Figure 1) in the northeast and southeast of France, including cities from the Channel region (Lens, Roubaix, Nogent sur Oise) to the German border (Strasbourg), remote rural sites located in between (Revin and Andra-OPE) as well as sites as an Alpine urban station (Grenoble) and sites near the Mediterranean Sea (Aix-en-Provence, Marseille, Nice, Port-de-Bouc). These sites are classified as rural background (Andra-OPE, Revin), urban background (Aix-en-Provence, Grenoble, Lens, Marseille, Nogent-sur-Oise, Nice, Petit Quevilly, Talence), traffic sites (Roubaix, Strasbourg), urban industrial (Port-de-Bouc). It is thought that the varied characteristics of the observational sites can give us an unprecedented possibility of evaluation of the simulated spore emissions and concentrations.

226

## 2.2. Regional Modelling

### 2.2.1. The chemistry transport model CHIMERE

CHIMERE is an eulerian state-of-the-art regional chemistry transport model (Menut et al., 2021). It is used operationally by the French platform PREV'AIR (Rouil et al., 2009) and the Copernicus Atmospheric Modelling System (CAMS) (Marécal et al., 2015) to forecast and monitor air quality. The version v2020r3 of CHIMERE has been used in this work (Menut et al., 2021).

234

236 The EMEP anthropogenic emissions inventory with a resolution of 10 km<sup>2</sup>  
 238 provides input data for anthropogenic emissions based on the methodology described  
 240 in Vestreng (2003). Biogenic VOC emissions are computed by CHIMERE based on  
 242 the Model of Emissions and Gases and Aerosols from Nature MEGAN 2.1 algorithm  
 244 (Guenther et al., 2012). The gas phase chemistry is provided by the Melchior2  
 mechanism (Derognat et al., 2003). The ISORROPIA II thermodynamic model is used  
 to compute the formation of inorganic aerosols based on the approach described in  
 Fountoukis and Nenes (2007). For organic aerosol formation and volatilisation of  
 primary organic aerosol, the volatility basis set (VBS) for the organic species as  
 described in Cholakian et al. (2018) was activated.

246 Chemical boundary conditions with a 3-hour temporal resolution are from the  
 CAMS project (Marécal et al., 2015), together with the chemical fields for the model  
 248 upper boundary at the 500 hPa level. The WRF 3.7.1 model ~~is used for meteorological  
 forecasting~~ (Skamarock et al., 2008) is used for meteorological simulation coupled to  
 chimere with no aerosol effect. The spectral nudging (Von Storch et al., 2000) is used  
 250 with NCEP temperature, wind, humidity, pressure for wavelengths higher than 2 000  
 km whereas in the boundary layer the WRF model freely generates its own dynamic.  
 252 For the emissions of biogenic volatile organic compounds (VOC) as well as for the  
 parameterisation of the emissions of primary organic aerosols, we use the LAI (Leaf  
 Area Index) obtained from the observations of the MODIS instrument with a frequency  
 of 8 hours and a native resolution of 30 seconds for each year (Sindelarova et al.,  
 256 2014). The simulation has been carried out during years 2013 and 2014 on a Wwestern  
 European domain, with a 9 x 9 km<sup>2</sup> horizontal resolution without nesting. It is run on 9  
 258 vertical hybrid levels from ground to an upper height of 500 hPa, the height of the first  
 layer being around 20 meters.

260

262 ~~Table 2 : Parameterisations initially considered for the present work.~~

| <del>Name in this work</del>   | <del>Variables</del>                                                                              | <del>Reference</del>                                       |
|--------------------------------|---------------------------------------------------------------------------------------------------|------------------------------------------------------------|
| <del>H&amp;S</del>             | <del>Leaf area index (LAI), specific humidity (q<sub>v</sub>)</del>                               | <del>(Heald and Spracklen, 2009; Hoose et al., 2010)</del> |
| <del>S&amp;D</del>             | <del>Land use classes</del>                                                                       | <del>(Sesartic and Dallafior, 2011)</del>                  |
| <del>Hummel</del>              | <del>Leaf area index (LAI), specific humidity (q<sub>v</sub>), surface temperature (T)</del>      | <del>(Hummel et al., 2015)</del>                           |
| <del>Janssen statistical</del> | <del>Leaf area index (LAI), specific humidity (q<sub>v</sub>), and wind friction speed (u*)</del> | <del>(Janssen et al., 2021)</del>                          |

264

### 266 2.2.2. Parameterisation of fungal spore OA emissions

268 In the Introduction section, we have presented several parameterisations of  
 fungal spores, ~~and which are listed in Table 2~~. Among the three of them (H&S, S&D  
 270 and Hummel) compared by Hummel et al. (2015) to observations, the S&D

parameterisation showed the worst statistical agreement, and also is based on seasonally fixed land-use parameters. It was therefore discarded. Among the two better performing parameterisations, we preferred the H&S parameterisation. This is because [our tests over the summer of 2014 with the in-Hummel's approach, show that](#) the inclusion of a temperature-dependent and vegetation-independent term leads to significant fungal spore emissions under high temperature conditions even at places where LAI is small and therefore no large emissions are expected ([sea and oceans, arid and desert soils](#)). ~~This yields to large emissions especially over Southern Europe which are not confirmed by measurements.~~ Finally, two recent parameterisations by Janssen et al. (2021) have been developed over the eastern United States using measurements of spore concentrations consider LAI, specific humidity and wind friction velocity in the first case, and a spore population model in the second. Comparisons with annual measurements of fluorescent primary organic aerosols at German, Finnish and Colorado sites show similar correlations between these two parameterisations and that of H&S (Janssen et al., 2021). With respect to these simulations, we preferred the simpler H&S parameterisation. This parameterisation was integrated in our simulations for its robustness at different sites and it has been set-up specifically for temperate latitude European conditions.

Equation 1 shows the fungal spore emission flux  $F_{H\&S}$  (unit: number of spores  $m^{-2} s^{-1}$ ) varying as a function of leaf area index  $LAI$  and specific humidity  $q_v$ . The constant  $c$ , equal to  $2315 m^{-2} s^{-1}$ , introduced by Hoose et al. (2010) accounts for fungal spore emission fluxes with an aerodynamic diameter of  $3 \mu m$  instead of  $5 \mu m$  (which was initially estimated).

$$F_{H\&S} = c \frac{LAI}{5 m^2 \cdot m^{-2}} \frac{q_v}{1.5 \times 10^{-2} kg \cdot kg^{-1}} = 30\ 867 \times LAI \times q_v \quad (1)$$

Fungal spore number concentrations are transformed into mass using an aerosol [relative](#) density of  $1 kg kg^{-1}$  which is used as reference [relative](#) density for the definition of aerodynamic diameter. All mass is attributed to organic matter. Within CHIMERE, fungal spores OA are prescribed as a new species considered as chemically inert in our simulation, but they can influence the condensation of semi-volatile secondary organic compounds (as part of the organic aerosol phase) and act as cloud condensation nuclei (Patade et al., 2021). [Fungal spores are treated as non-soluble particles and considered as monodispersed with a diameter of  \$3 \mu m\$  in a model size class closest to  \$3 \mu m\$ . In the model configuration with 10 size bins, spores are included in the size bin 8 corresponding to sizes between  \$2.5\$  and  \$5 \mu m\$ , with an average diameter of  \$3.5 \mu m\$ .](#) However, no conclusive laboratory data are available to include such processes in a model. Other processes considered in the model apart from emissions are transport, and size-resolved dry and wet deposition with characteristics like that of primary anthropogenic aerosols.

### 3. Results

We will present here the results of the two-year long simulations containing fungal spores' organic aerosol. Our initial analysis delves into the variability of



318 simulated emissions and concentration patterns, along with their impact on the  
319 simulated PM<sub>10</sub> levels. We will then present an assessment of the simulated  
320 concentration fields with respect to polyol observations as well as primary biogenic  
organic burden as determined by the source apportionment studies.

### 322 3.1. Simulated two years of fungal spore primary organic aerosol

324 Figure 2 presents the seasonal variation in emissions and concentrations of  
325 fungal spore primary organic aerosols for the years 2013 and 2014 averaged, as well  
326 as that of LAI and specific humidity, obtained from our simulations. As parametrised,  
327 emissions are largely driven by vegetation density (represented here by the LAI) with  
328 emission structures that follow the distribution of the main French forest areas. Major  
329 forested areas and emission hotspots are seen over the Massif Central (centred at 2  
330 °E, 45.5 °N), the Jura (6 °E, 47 °N), the lower parts of the Alps (7 °E, 46 °N) and  
331 Pyrenees (0 °E, 43 °N), and the Landes Forest (-1 °W, 45 °N). Specific humidity, which  
332 is the other parameter used explicitly in the flux calculation (equation 1), is more  
333 homogeneous and its signature on the fluxes of spore emissions is less easily  
334 identifiable. LAI and specific humidity show the same seasonal cycles with higher  
335 values in summer and lower values in winter when the vegetation density and water  
336 content of the colder atmosphere are lowest. We can therefore hypothesise that LAI  
337 and specific humidity are responsible for much greater fungal spore emissions in  
338 summer than in winter.

339 Concentrations of atmospheric spores are found to be highly correlated with  
340 emissions, both spatially and on a seasonal scale. Small differences can be explained  
341 by transport and deposition processes. For instance, due to advection, contrasts in  
342 concentrations are less pronounced than those in emissions. Hummel et al. (2015)  
343 assumes that the lifetime of fungal spores is of about 5 hours in the atmospheric  
344 boundary layer. This short lifetime means that there is a small chance of long-distance  
345 transport, which explains the closeness of local concentrations to emission sources.  
346 Moreover, in our simulations, the total deposition flux of fungal spores is fairly rapid  
and can reach a maximum of 10 ng m<sup>-2</sup> s<sup>-1</sup> on average over the two years, with 8 ng  
348 m<sup>-2</sup> s<sup>-1</sup> for dry deposition and 5 ng m<sup>-2</sup> s<sup>-1</sup> for wet deposition. In summer, this total spore  
349 deposition reaches a maximum of 20 ng m<sup>-2</sup> s<sup>-1</sup> in France, around 12 ng m<sup>-2</sup> s<sup>-1</sup> in the  
350 Massif Central, while spore emissions peak in this area at 25 ng m<sup>-2</sup> s<sup>-1</sup> on average  
over the summer period. The difference in emissions and deposition is therefore  
351 significant, confirming also partial transport out of source regions. Since only the  
transport and deposition of fungal spores are taken into account, without interactions  
353 with other species, the conditions are similar to those of Hummel et al. (2015), with a  
lifetime of the same order of magnitude (5 hours), further confirming the low transport  
355 of spores.

356 Despite little these conditions of transport and deposition, spore concentrations  
357 at locations up to a few hundred kilometers away can be similar in mass and temporal  
358 variation, explained by similar meteorological conditions and leaf area index, leading  
359 to simultaneous emissions (Samaké et al., 2019b). Seasonal averages of fungal spore  
360 concentrations can reach values of several µg m<sup>-3</sup> over large geographical areas,  
361 especially over the forested areas in the southern part of France (Massif Central). This  
362 is significant in view of the PM<sub>10</sub> concentration there and consistent with previous

364 studies (Heald and Spracklen, 2009). For instance, fungal spore OA contributes to  
about 20 % of PM<sub>10</sub> mass on summer averaged over the Massif Central (Figure 3). On  
366 the contrary, during winter, fungal spore concentrations remain always below 0.5 µg  
m<sup>-3</sup>, and do not contribute much to PM<sub>10</sub>, with a value always below a few percent.  
368 Spring and autumn are intermediate, both in terms of fungal spore OA concentrations  
and contributions to PM<sub>10</sub>. With the lower formation of BSOA compared to summer,  
370 the contribution of fungal spores to OM is largest in autumn, when it can reach around  
40 %. It can reach about 30 % in other seasons with some geographical disparities.  
372 Despite low emissions and concentrations, the contributions of spores to  
concentrations of biogenic organic aerosols (BOA) is greatest in winter, reaching up to  
374 70 %, due to the very low contribution of secondary biogenic organic aerosols during  
this period, in contrast to the summer period.

376

378

380

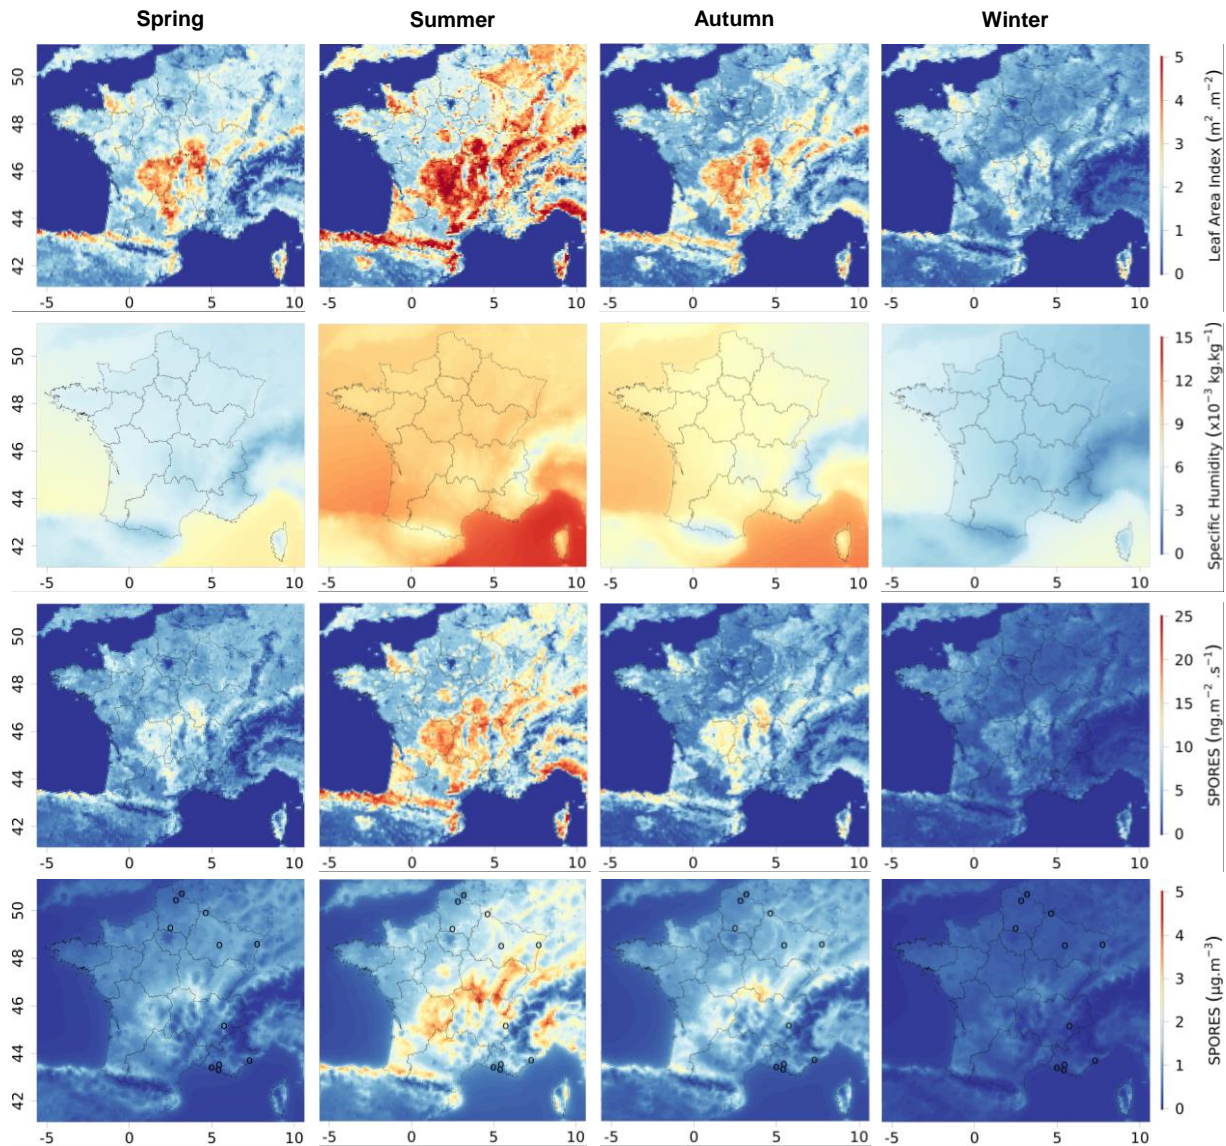

382

Figure 2 : Seasonal mean leaf area index (LAI), specific humidity, as well as emissions and concentrations of fungal spores modelled with CHIMERE for 2013 and 2014 in France, respectively from top to bottom. [The seasonal variation by season](#) for spring (March to May), summer (June to August), autumn (September to November), and winter (December to February), [are illustrated](#) respectively from left to right. The circles represent the location of the measurement sites. [The same maps are shown in the supplement \(Figure S1\).](#)

384

386

388

390

392

394

396

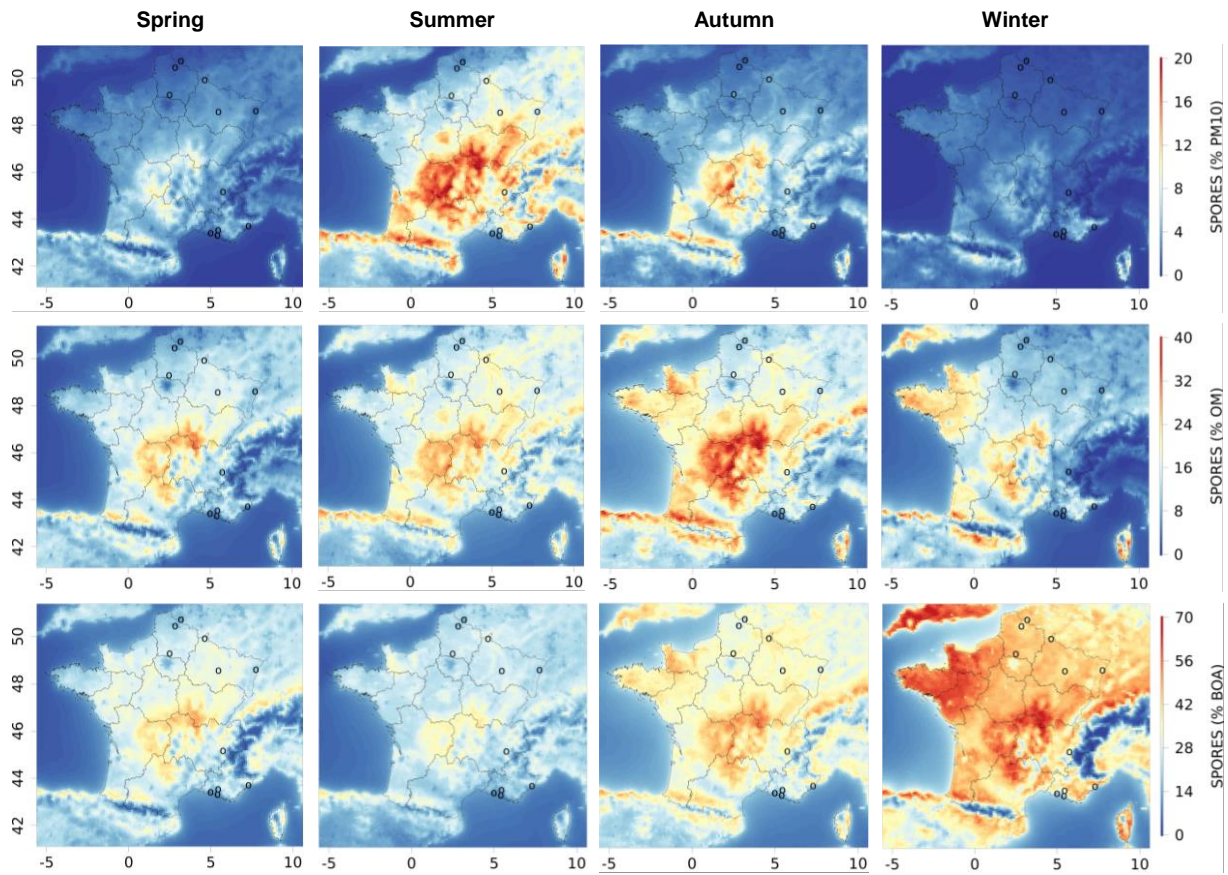

400 **Figure 3 : Seasonal contribution of fungal spores organic aerosols matter to PM<sub>10</sub>, OM and biogenic**  
 402 **organic aerosols (BOA) modelled with CHIMERE for 2013 and 2014 in France, respectively from top to**  
 404 **bottom, by the seasonal variation season for spring (March to May), summer (June to August), autumn**  
 406 **(September to November), and winter (December to February), are illustrated respectively from left to right.**  
 408 **The circles represent the location of the measurement sites. The same maps are shown in the supplement**  
 410 **(Figure S2).**

404

406

408

410

412

414

416

418

420

## 422 3.2. Comparison of fungal spore simulations to observations

### 424 3.2.1. General comparison for the entire data set

426 In order to compare simulations with observations, we can rely on two types of  
428 datasets available for several sites (as described respectively in sections 2.1.1 and  
430 2.1.2): first the polyol concentrations, and second the total OM concentration within the  
432 primary biogenic factor (OMpb) derived from PMF analysis of PM<sub>10</sub> filter samples. For  
434 these comparisons to be meaningful, we need to convert the simulated fungal spore  
436 organic aerosol concentrations into polyol ones. Bauer et al. (2008b) derived a  
438 conversion factor for this purpose, for the temperate latitude continental urban site of  
440 Vienna. For the sum of arabitol and mannitol, which are the two sugar alcohol species  
442 measured in our data base, the latter authors found an average mass of 2.9 (2 – 4.2)  
444 pg per fungal spore. Elbert et al. (2007) assumed an average mass of a fungal spore  
446 of 65 pg. Combining these values yields to a [percentage of polyol per mass of fungal  
448 spore mass ratio](#) of 4.5 % (3.1 – 6.5 %), which will be used for the comparisons that  
450 follow. This is coherent with the work of Heald and Spracklen (2009), who used this  
452 same combination of values in order to derive their initial estimation of the mass of  
454 fungal spore emissions from multi-site polyol measurements.

456 We can first obtain a general picture of the performances of the model by  
458 studying the correlations and biases for all of sites with polyol measurements. For the  
460 169 polyol monthly averages from 11 sites, the median mean fractional bias (MFB) is  
462 slightly negative (-11 %), but with a large range of values for individual sites ranging  
464 from -78 % to +53 % (Figure 4, Table S1)<sup>1</sup>. Using the lower and upper boundaries for  
466 the conversion factor between mass of spore and mass of polyols (3.1 and 6.5,  
468 respectively), the corresponding median MFB values would be -47 % and +26 %. As  
470 a conclusion, within the range of quantified uncertainties, the median MFB for monthly  
472 polyol means of -11 % is statistically close to zero. A bias calculation performed directly  
474 with the 1497 daily means shows very similar results, with a median MFB of -11 %  
476 (range for the -81 % to +49 %). This is not surprising, since the comparison of monthly  
478 means has been based only on days for which observations were available. [The  
480 complicated results observed at stations on the Mediterranean coast \(Aix-en-  
482 Provence, Marseille, Nice, Port-de-Bouc\) will be discussed in the next section.](#)

484 Next, simulated fungal spore OA is compared to OM in the primary biogenic  
486 factor (OMpb) (see section 2.1.2). Our simulations show a median [MFB-bias \(MFB\)](#) of  
488 -28 % and a range from -116 % to +22 % for different sites (Figure 4, data from 98  
490 monthly means for 7 sites). A negative bias is expected for this comparison, since the  
492 PMF factor is likely to include OM contributions from BSOA in addition to that from  
494 fungal spores (see section 2.1.2). As a result of this bias analysis with two different  
496 types of observations (polyols, OMpb), we do not observe the presence of a systematic  
498 bias for our fungal spore OA simulations for the ensemble of French sites. This agrees  
500 with (Hummel et al., 2015), who also could not conclude on a significant bias of the  
502 H&S parameterisation.

464

---

<sup>1</sup> Note that following the definition of MFB (see SI), a relative difference between simulations and observations of a factor 2 (1/2) corresponds to a MFB of 67 % (-67 %). Thus in very crude manner, the simulations with sites with the largest and lowest MFB show a factor 2 difference with observations.

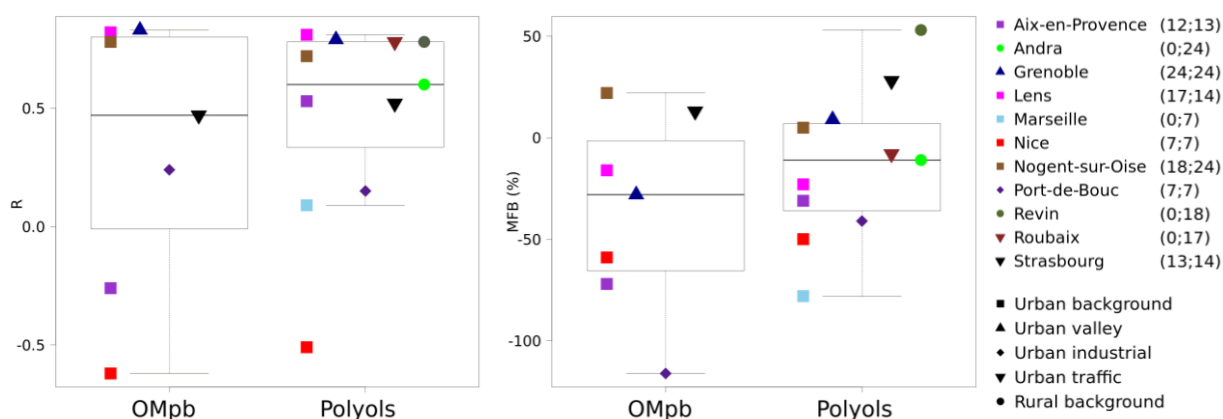

466

Figure 4 : Comparisons of simulated monthly mean concentrations of fungal spore OA to OM from PMF primary biogenic factor (OMpb) and polyols measurements (sum of mannitol and arabitol). Biannual mean  $\epsilon$  Correlations and mean fractional bias (MFB) boxplots are obtained using the scores for each site (1 point per site) and respectively are illustrated respectively at left and right side. The points corresponding to the sites represent the scores obtained on all the data for the site. Ranges between minimal and maximal values, and medians for respectively 7 and 11 sites. The number of monthly data for OMpb and polyols are noted next to the station list out of a total of respectively 98 and 169 monthly data. The same figure with daily data is shown in the supplement (Figure S3).

468

The data sets were also used in order to assess if the H&S parameterisation is able to reproduce the daily and the monthly average time variation (Figure 4 and Figure S34, Table S1). For daily polyol averages, the median correlation between simulations and measurements is 0.43 with a range from -0.19 to 0.57 for the 11 sites. The median correlation is increased to 0.60 when looking at monthly averages with a large range from -0.51 to 0.83. Expectedly, for many, but not all sites, the parameterisation better depicts the seasonal variation (with larger summer and lower winter values) compared to the daily variations (Figure S34). We will discuss this result further on a site-by-site basis in section 3.2.2. Finally, for comparison with the same polyol data set, daily and monthly mean fractional error-bias (MFBE) are respectively 0.79-11 % and 0.56-11 % at all sites (Table S1, Figure S32). The root mean square error (RMSE) and the mean fractional error (MFE) was also calculated for estimating the error (Table S1, Figure S4). Daily and monthly MFE are respectively 79 % and 56 % at all sites; for the median RMSE the results are respectively 0.04  $\mu\text{g m}^{-3}$  and 0.03  $\mu\text{g m}^{-3}$  the median RMSE calculated with daily polyol data is 0.04  $\mu\text{g m}^{-3}$  and 0.03  $\mu\text{g m}^{-3}$  with monthly data.

484

486

488

490

492

494

496

498 **3.2.2. Comparison of time series at selected sites**

500 In this section, we evaluate the robustness of our simulations as a function of  
502 the period of the year. To do so, comparisons are conducted between model outputs  
504 and polyol observations, which are available for more measurement sites than sites  
506 with PMF results. These comparisons especially aim at understanding the large ranges  
508 of biases and correlations encountered in the previous section. Figure 5 shows  
510 observed and estimated monthly mean polyol (sum of arabitol and mannitol  
512 concentrations) at the sites with the most data (> 130 daily data) during years 2013  
and 2014, namely Grenoble, Lens, Nogent-sur-Oise, Revin and Roubaix. These sites  
also have the advantage of being of different types, respectively urban background in  
an Alpine valley, urban background, urban background, rural background, and road  
traffic. The time series for the other sites are shown in Figure S35, Figure S46, Figure  
S57. We indicate both the simulated monthly means using data from all days, and only  
for days for which filter samples are available.

Differences between simulations and measurements are small (<10 %) for most  
of the values, which underlines the robustness of the model for monthly averages.  
Figure 5 shows simulated seasonal cycles coherent with that in Figure 2 which reflects  
the dependence of the simulated emissions on the LAI. We observe the maximum  
monthly values for the summer months with a difference in structure between 2013  
and 2014: while in 2013 the simulated maximum occurs in July for all of the sites, in  
2014, it occurs in September at least for the sites in Northern France (Roubaix, Lens,  
Nogent-sur-Oise, Andra-OPE, Strasbourg). The highest summer measurement values  
of polyols (0.1 – 0.15  $\mu\text{g m}^{-3}$  corresponding to 2 - 3  $\mu\text{g m}^{-3}$  of Ompb for monthly  
averages) are of course simulated on the sites where the regional LAI are the strongest  
(e.g. Grenoble, Andra-OPE, Revin, Strasbourg, Nogent-sur-Oise) as opposed to Lens,  
Roubaix, Marseille, Aix, Port-de-Bouc for which the LAI of the adjacent regions are  
lower. However, none of the measurement sites are located within the area of large  
simulated fungal spore OA concentrations over the Massif Central. Comparisons  
between simulations and observations show a remarkable agreement especially in the  
seasonal variation for the stations in the northern part of France (Lens, Roubaix, Revin,  
Nogent-sur-Oise), resulting in monthly correlation coefficients (R) of respectively 0.78,  
0.83, 0.78 and 0.72. Specifically, the gradual increase in polyols (and related fungal  
spores OM) from March to July is very well simulated, except for Revin for which  
summer concentrations are overestimated. MFB values vary between -23 % for Lens  
and +53 % for Revin.

534

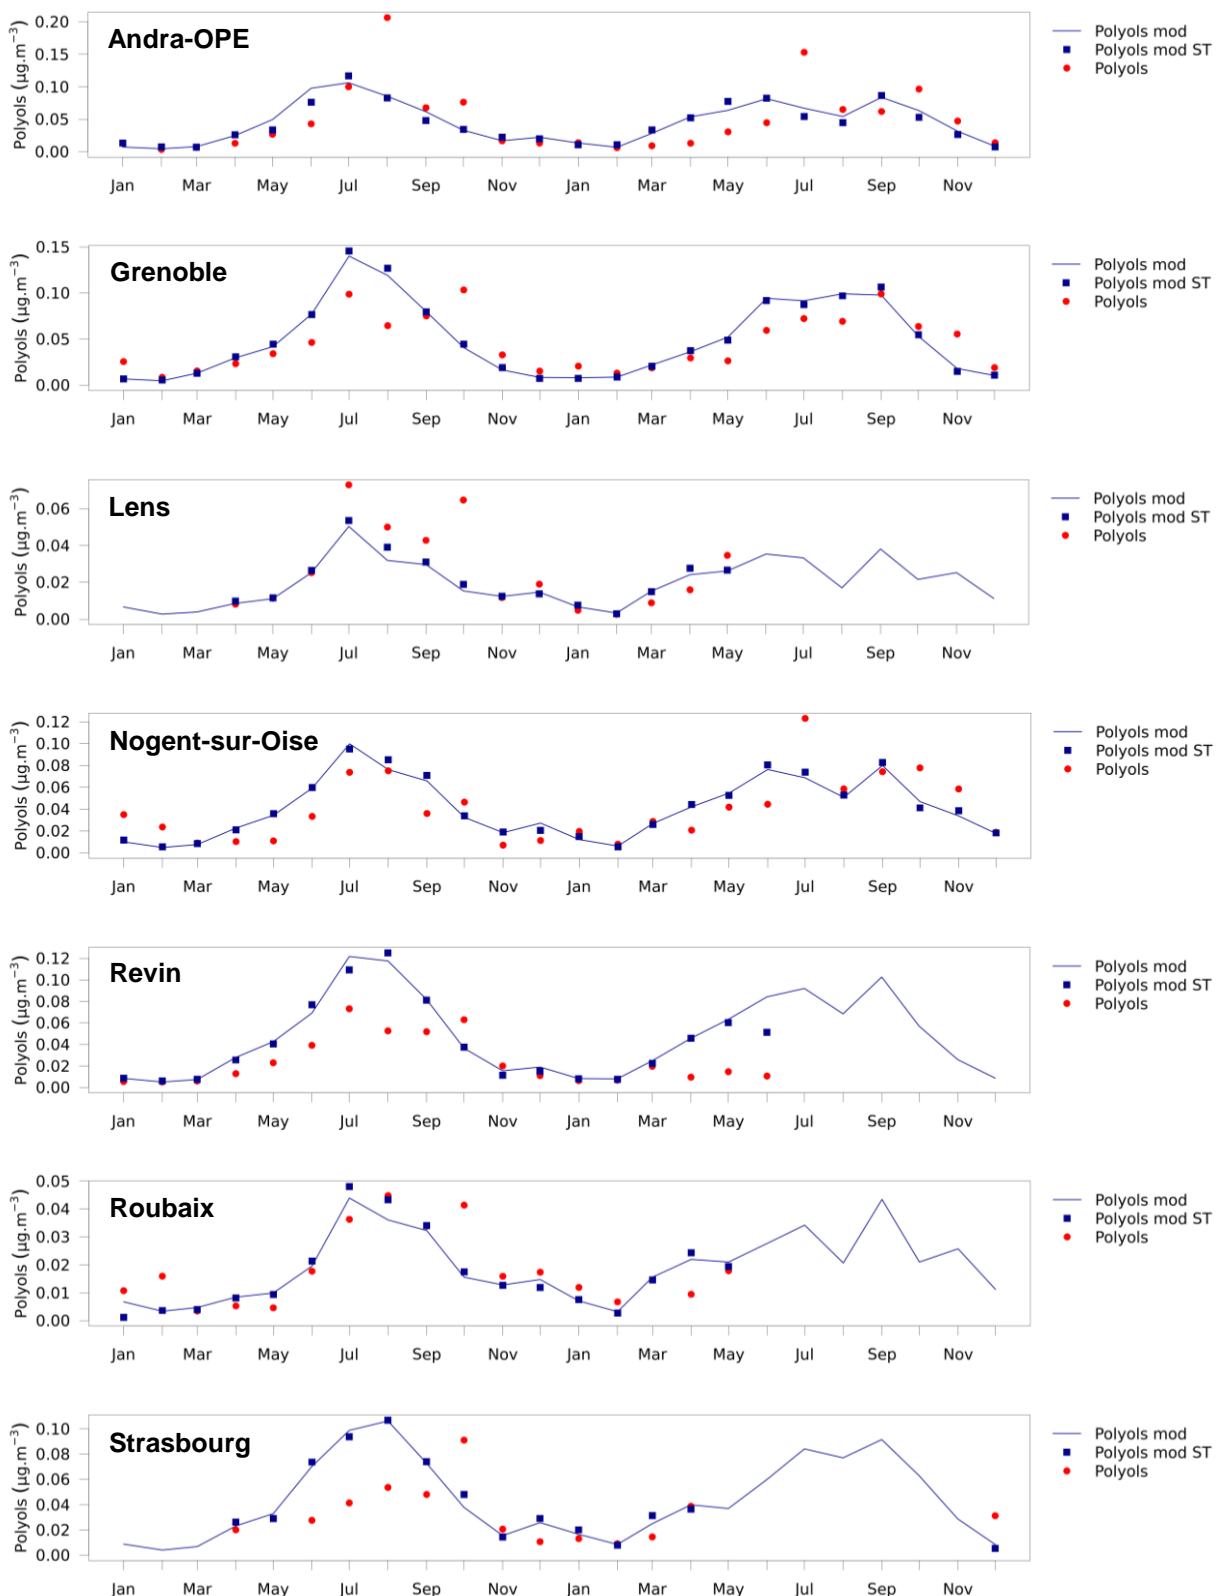

536

**Figure 5 : Timeseries of monthly-mean polyol concentrations over 2013 and 2014 modelled by CHIMERE (blue line), measured at the sites (red dots) and modelled by CHIMERE using the same timebase as the measurements (blue squares). The simulated polyols values have been obtained by multiplying spore concentrations from CHIMERE by 4.5 %. Only the sites outside the Mediterranean area are shown. [The same figures for OMpb and other sites are shown in the supplement \(Figure S5, S6, S7\).](#)**



Correlations for eastern French sites are a bit lower, with 0.60 for the Andra-OPE site and 0.52 for Strasbourg with MFB respectively of -11 % and +28 %. For Grenoble, a city in SE of France within the Alps, the correlation is good ( $R = 0.79$ ) and the bias is small (MFB = +9 %). For a group of sites in the south of France (Port-de-Bouc, Marseille, Nice), located less than 10 km from the Mediterranean Sea, the situation is singularly different, with strong underestimations in the simulation. It should also be noted that we have fewer observations at these sites (only seven monthly mean observations from June to December 2014), meaning that a full seasonal cycle was not obtained. Still, the simulated decline in autumn/winter (October to December) compared with summer (June to August) is not observed at these sites, resulting in low or even negative correlations for monthly means between -0.51 and 0.15 and negative biases (MFB values between -41 % and -78 %). Similarly, for Aix-en-Provence, some 30 km inland, winter polyol levels are strongly underestimated, resulting in a MFB of -31 % and a correlation of 0.53.

### 3.3. Discussions

Overall, results obtained in this study demonstrate that the H&S parameterisation implemented into the CHIMERE model works remarkably well to reproduce the concentrations of fungal spore OA (or at least a proxy of these concentrations, with the polyols measurements) observed at sites located in the northern (Lens, Roubaix, Revin, Nogent-sur-Oise) and eastern (Andra-OPE, Strasbourg, Grenoble) parts of France. Indeed, the seasonal cycles observed at these sites and the intensity of the concentrations are remarkably well simulated by the model for the monthly averages. This gives great confidence in the ability of the H&S parameterisation to reproduce the fungal spore OA source over large parts of France. This extends the results from the earlier work of Hummel et al. (2015) based on an evaluation of 4 sites located in more northerly parts of Europe (Finland, Ireland, UK, Germany) limited to a week in the end of August, to more southerly regions, but still with temperate vegetation, and full seasonal cycles. For Europe, this extends also the results from Janssen et al. (2021) who implemented the H&S parameterisation into the global GEOS-Chem model. They compared the model output to yearly FBAP observations at the same sites in Finland and Germany and found rather similar seasonal variations with summer maxima and winter minima, although the simulated maximum occurred in June (2010), while it was observed in August. Note that Janssen et al. (2021) shows that the H&S parameterisation shows a strong overestimation of fungal spore numbers with respect to observations in the US.

Another remarkable fact is that positive results in our study have been obtained from sites with very different land-use typologies, ranging from traffic (Roubaix and Strasbourg) and urban background (Lens, Nogent-sur-Oise) to rural (Revin, Andra-OPE), or an urban background site within an Alpine valley (Grenoble). This can be explained by the fact that, due to low levels of long-distance transport, fungal spore OA seems to be controlled by the vegetation at local scale, as also pointed out already for Grenoble by Samaké et al. (2019a).

Despite these overall encouraging results, several limitations appear for our study. One is probably related to the simplification of using a unique LAI parameter

584 which cannot consider differences in vegetation typology. This may explain strong  
differences in MFB values between sites in NE France: Revin, located in a forest rich  
586 area in the Ardennes, shows a strong positive MFB of +53 % (the largest one  
encountered in our study), while the Andra-OPE site surrounded by extensive field  
588 crops shows an MFB of -11 %. For this latter site, we also can note that several  
observed daily peaks (in August 2013 and July 2014), as large as  $5 \mu\text{g m}^{-3}$  are not  
590 simulated. Such peaks may be related to agricultural activities such as harvesting as  
demonstrated by Samaké et al. (2019b) from the record of field work. In addition,  
592 atmospheric concentrations of fungal spores mainly come from plant host species  
(Samaké et al., 2020), so mechanised crop pruning and harvesting can have an impact  
594 on spore concentrations in rural areas. The processes which are known to trigger  
fungal spore emissions are not included specifically in the H&S parameterisation. In  
596 the context of this work, we did not seek to better characterise this potential missing  
source, but it is an interesting perspective for future work.

598 Our study also clearly shows the inability of the H&S parameterisation to  
correctly reproduce OMpb and polyol measurements for Mediterranean areas in  
600 Southern France, even though as noted before, our observational data base is weaker  
for this region. However, at these sites, analysis of the chemical composition of  
602 aerosols in the PM<sub>10</sub> fraction also showed poor simulation of the chemical species,  
suggesting a more global problem in the Mediterranean area. This could be explained  
604 by the specific dynamics in this sector (sea breezes, strong mistral-type winds) coupled  
with significant orography and heavy urbanisation. As a result, failure to take account  
606 of wind speed in the parameterisation of H&S may be a major cause of a lack of  
emission and concentration in the Mediterranean area. Again, this failure may also be  
608 related to the fact the LAI does not capture specific characteristics of Mediterranean  
type vegetation, and which are not included in the H&S parameterisation, mainly tested  
610 for sites mostly in northern Europe. In addition, it is striking that our simulations on  
Mediterranean sites, as expected still simulate weak autumn/winter emissions due to  
612 low LAI and specific humidity, but which are in contradiction to the still large observed  
concentrations. This could be due to a relatively stronger importance of soil related  
614 fungal spore emissions, which would be independent of LAI. Further, the drier and  
hotter Mediterranean climate could lead to relatively smaller emissions during dry  
616 summers and relatively larger emissions during winter still warm enough to allow for  
fungal spore emissions. It was observed by Samaké et al. (2019b) that the sudden  
618 and large decrease of the fall concentrations to the winter levels observed  
simultaneously in Grenoble and Chamonix (160 km apart) coincides with a first night  
620 temperature below +5 °C, which may be a threshold for the fungi population in this  
area. Such complex relationships would not be captured by the single specific humidity  
622 parameter which agglomerates information from relative humidity and temperature.

624 Finally, it may be noted that marine sources could also contribute to enhanced  
polyol levels and organic aerosol at near coastal sites, although such sources are not  
626 considered in our simulation. For instance, Fu et al. (2013) reports that large mannitol  
concentrations, up to more than  $50 \text{ ng m}^{-3}$  over the Arctic Ocean, are comparable to  
628 the maximum concentrations observed at our Mediterranean coastal sites. They  
attribute this source to long range transport of fungal spores, despite the small  
transport distance at least in the boundary layer due to efficient dry deposition. Direct  
630 marine sources for polyols are an alternative explanation (algae, marine fungi).  
Particularly, mannitol can account up to 20-30 % of the dry weight of some algae

632 species and is likely to be an important source of carbon for marine heterotrophic  
634 bacteria (Groisillier et al., 2015). As a conclusion, the H&S parameterisation should not  
636 be applied for PBOA emissions in Mediterranean or marine areas, and further work is  
needed to better document PBOA concentrations and emission processes in such  
areas.

#### 638 4. Conclusions

640 In this work, we introduced the parameterisation proposed by Heald and  
Spracklen (2009) for fungal spore OA emissions and updated by Hoose et al. (2010)  
642 into the CHIMERE regional chemistry-transport model (hereafter called H&S). The  
rationale for this work is to recognise the potentially important contribution of fungal  
644 spore to summertime PM<sub>10</sub> (Samaké et al., 2019a, b) that can fill in the missing part of  
the OM in chemistry transport models. The simplicity of the H&S parameterisation  
646 gives us specific advantages: a unique LAI parameter gives a slow varying emission  
potential, which is modulated with respect to meteorological conditions by specific  
648 humidity.

Here, we largely extend the geographical and temporal validity of this  
650 parameterisation, which has only been tested before for a limited dataset of  
observations at northern European locations during the end of summer, to a two-year  
652 dataset of seven sites over north-eastern France. Both polyols (more precisely sum of  
arabitol and mannitol observations), and a primary biogenic organic aerosol factor from  
654 PMF analysis show only limited biases for these sites, respectively +5 % and -2 %, in  
terms of MFB (from 4 sites only for the comparison with PMF analysis). These small  
656 biases, largely within the incertitude of the polyol/OM conversion factor and of the PMF  
factor, are a positive outcome of our study. In addition, for this group of sites, the  
658 seasonal variation of fungal spore emissions, displaying large summer and small  
winter values, is correctly depicted, as manifested in large monthly mean correlations  
660 (median 0.78, range from 0.52 to 0.83, from polyol measurements).

Still, and obviously, limitations can be noted, such as a wide range of biases for  
662 individual sites, with MFB values between -23 % and +53 % for polyol observations.  
This might be related to biome specific differences in the emissions only described by  
664 a single LAI parameter. The emission variability on a day-to-day basis is only partly  
expressed by the single specific humidity parameter (range of correlation coefficients  
666 between 0.31 and 0.57 for the polyol measurements at the 7 sites in North-eastern  
France). Here, using a more sophisticated combination of meteorological parameters  
668 would be desirable to improve the modelling, as for example in Janssen et al. (2021)  
including also maximum and minimum daily temperatures and friction velocity (even if  
670 these authors did not evaluate the capacity of such a combination to simulate the daily  
PBOA variation). One possible reason for the lack of correlation in daily time series is  
672 the impact of land-use dependent activities, such as annual harvest or tilling in  
agricultural areas.

674 For a smaller group of Mediterranean sites, with less observational data  
coverage, the H&S parameterisation failed to capture fungal spore emissions both in  
676 terms of absolute values and in seasonal variations, leading to strong negative biases  
especially during the autumn/winter seasons. As a conclusion, for this region the use  
678 of the H&S parameterisation in regional PM modelling may not consider certain factors

necessary for these specific sites. In particular, the night-time temperature was milder than at the other sites, allowing fungal spores to be released even in winter. Additional efforts are required to enhance the model dynamics specifically over Mediterranean coastal environment. This includes extending the simulation of fungal spores over more extended periods in these locations which also includes an assessment of transport and storage. Furthermore, there is a need to better characterise a source of Mediterranean marine organic aerosol (AO) that is distinct from fungal spores but shares the emission of polyols. It is also necessary to have more measurement points in this specific area to be able to achieve a more concrete conclusion.

These two year-round CHIMERE simulations incorporating the H&S parameterisation revealed a significant contribution of fungal spore OA to PM<sub>10</sub> mass, which is of the order of one percent or less during winter, and up to 20 % during summer in high emission zones over forested areas such as the Massif Central. In terms of contribution to OM, the simulated autumn fungal spore contribution is even as high as 40 %. This large predicted fungal spore OA contribution over the Massif Central however still warrants confirmation by observations.

Finally, the projected impact of fungal spore organic aerosol ~~(OA)~~ suggests significant and seasonally variable contributions to both PM<sub>10</sub> and OAM mass. Consequently, the simulation of spores should be included in state-of-the-art chemistry transport models. While the validity of the H&S parameterisation has been demonstrated with a good agreement with measurements across northern and eastern France, its application is cautioned against in Mediterranean regions.

728

### **Code and data availability**

730 All measurement and PMF data for this paper are archived at the IGE, and are  
732 available on request from the corresponding authors (JLJ and GU). The codes and  
modelling data are available from the LISA authors (MV, GF, MB, GS).

The model is available here: <https://www.lmd.polytechnique.fr/chimere/>

734 The MODIS observations are available here :  
<https://modis.gsfc.nasa.gov/data/dataproduct/mod15.ph>

736

### **Author contributions**

JLJ and GU provided the PM<sub>10</sub>, polyol and PMF speciation data developed at the IGE  
740 for the PhD work of Abdoulaye Samaké and Samuel Weber. OF completed the data  
set with those obtained at the LCSQA during the CARA programme. FC developed the  
742 H&S parameterisation code at INERIS, GS adapted the code for a more recent version  
of the CHIMERE model at LISA. AC contributed to the LAI mapping. MV, GF, MB,  
744 designed the numerical experiments. MV performed the simulations, produced figures  
and tables, and wrote the paper. All co-authors contributed to the discussion of the  
746 results. MV prepared the paper with contributions from all co-authors. MV, MB, GF,  
GS, JLJ and GU designed the study. MV, MB, GF, GS, JLJ, GU, OF, FC and AC  
748 contributed to the writing of the article.

750

### **Competing interests**

752 The authors declare that they have no conflict of interest.

754

### **Acknowledgments**

756 This work was granted access to the HPC resources of TGCC under the  
allocation 2022-A0130107232 made by GENCI.

758 The authors warmly thank the dedicated work of many personal in the field for  
collecting the samples in all the sites from the AASQA (Atmo AuRA, Atmo Sud, Atmo  
760 HdF, Atmo GE, ...). Also we would like to thank all the technicians in the Air O Sol  
analytical plateau at IGE for their work on the samples.

762 [Many thanks to Hans Puxbaum for a close look at the paper in ACPD and a few interesting remarks.](#)  
[Thanks also to the 2 anonymous reviewers who helped to improve the quality of this work.](#)

764

### **Financial support**

The PhD of M. V is funded by ADEME and the Paris Region in the framework of the  
768 research network on air quality, the DIM Qi<sup>2</sup>. This work has been supported by the EU  
Horizon 2020 Green Deal project RI-URBANS (grant no. 101036245).

770 The ANR program “Atmospheric Biogenic Sugar” ANR-21-CE01-0021-01 provided  
some financial support for this collaboration, while analytical aspects were also

772 supported at IGE by the Air-O-Sol platform within Labex OSUG@2020 (ANR10  
LABX56). The work at IGE for the Andra-OPE site is supported by a long-term grant  
774 from ANDRA.

## 776 **References**

Bauer, H., Kasper-Giebl, A., Löflund, M., Giebl, H., Hitzemberger, R., Zibuschka, F.,  
778 and Puxbaum, H.: The contribution of bacteria and fungal spores to the organic carbon  
content of cloud water, precipitation and aerosols, *Atmospheric Res.*, 64, 109–119,  
780 [https://doi.org/10.1016/S0169-8095\(02\)00084-4](https://doi.org/10.1016/S0169-8095(02)00084-4), 2002.

Bauer, H., Claeys, M., Vermeylen, R., Schueller, E., Weinke, G., Berger, A., and  
782 Puxbaum, H.: Arabitol and mannitol as tracers for the quantification of airborne fungal  
spores, *Atmos. Environ.*, 42, 588–593,  
784 <https://doi.org/10.1016/j.atmosenv.2007.10.013>, 2008a.

Bauer, H., Schueller, E., Weinke, G., Berger, A., Hitzemberger, R., Marr, I. L., and  
786 Puxbaum, H.: Significant contributions of fungal spores to the organic carbon and to  
the aerosol mass balance of the urban atmospheric aerosol, *Atmos. Environ.*, 42,  
788 5542–5549, <https://doi.org/10.1016/j.atmosenv.2008.03.019>, 2008b.

Belis, C. A., Pernigotti, D., Pirovano, G., Favez, O., Jaffrezo, J. L., Kuenen, J., Denier  
790 Van Der Gon, H., Reizer, M., Riffault, V., Alleman, L. Y., Almeida, M., Amato, F.,  
Angyal, A., Argyropoulos, G., Bande, S., Beslic, I., Besombes, J.-L., Bove, M. C.,  
792 Brotto, P., Calori, G., Cesari, D., Colombi, C., Contini, D., De Gennaro, G., Di Gilio, A.,  
Diapouli, E., El Haddad, I., Elbern, H., Eleftheriadis, K., Ferreira, J., Vivanco, M. G.,  
794 Gilardoni, S., Golly, B., Hellebust, S., Hopke, P. K., Izadmanesh, Y., Jorquera, H.,  
Krajsek, K., Kranenburg, R., Lazzeri, P., Lenartz, F., Lucarelli, F., Maciejewska, K.,  
796 Manders, A., Manousakas, M., Masiol, M., Mircea, M., Mooibroek, D., Nava, S.,  
Oliveira, D., Paglione, M., Pandolfi, M., Perrone, M., Petralia, E., Pietrodangelo, A.,  
798 Pillon, S., Pokorna, P., Prati, P., Salameh, D., Samara, C., Samek, L., Saraga, D.,  
Sauvage, S., Schaap, M., Scotto, F., Sega, K., Siour, G., Tauler, R., Valli, G., Vecchi,  
800 R., Venturini, E., Vestenius, M., Waked, A., and Yubero, E.: Evaluation of receptor and  
chemical transport models for PM10 source apportionment, *Atmospheric Environ. X*,  
802 5, 100053, <https://doi.org/10.1016/j.aeaoa.2019.100053>, 2020.

Borlaza, L. J. S., Weber, S., Uzu, G., Jacob, V., Cañete, T., Micallef, S., Trébuchon,  
804 C., Slama, R., Favez, O., and Jaffrezo, J.-L.: Disparities in particulate matter (PM10)  
origins and oxidative potential at a city scale (Grenoble, France) – Part 1: Source  
806 apportionment at three neighbouring sites, *Atmospheric Chem. Phys.*, 21, 5415–5437,  
<https://doi.org/10.5194/acp-21-5415-2021>, 2021.

808 Cavalli, F., Viana, M., Yttri, K. E., and Genberg, J.: Toward a standardised thermal-  
optical protocol for measuring atmospheric organic and elemental carbon: the  
810 EUSAAR protocol, *Atmospheric Meas. Tech.*, 3, 79–89, <https://doi.org/10.5194/amt-3-79-2010>, 2010.

812 Cholakian, A., Beekmann, M., Colette, A., Coll, I., Siour, G., Sciare, J., Marchand, N.,  
Couvidat, F., Pey, J., Gros, V., Sauvage, S., Michoud, V., Sellegri, K., Colomb, A.,  
814 Sartelet, K., Langley DeWitt, H., Elser, M., Prévot, A. S. H., Szidat, S., and Dulac, F.:  
Simulation of fine organic aerosols in the western Mediterranean area during the

- 816 ChArMEx 2013 summer campaign, *Atmospheric Chem. Phys.*, 18, 7287–7312, <https://doi.org/10.5194/acp-18-7287-2018>, 2018.
- 818 Derognat, C., Beekmann, M., Baeumle, M., Martin, D., and Schmidt, H.: Effect of  
820 biogenic volatile organic compound emissions on tropospheric chemistry during the  
Atmospheric Pollution Over the Paris Area (ESQUIF) campaign in the Ile- de- France  
region, *J. Geophys. Res. Atmospheres*, 108, 8560,  
822 <https://doi.org/10.1029/2001JD001421>, 2003.
- Després, V. R., Huffman, J. A., Burrows, S. M., Hoose, C., Safatov, A. S., Buryak, G.,  
824 Fröhlich-Nowoisky, J., Elbert, W., Andreae, M. O., Pöschl, U., and Jaenicke, R.:  
Primary biological aerosol particles in the atmosphere: a review, *Tellus B Chem. Phys.*  
826 *Meteorol.*, 64, 15598, <https://doi.org/10.3402/tellusb.v64i0.15598>, 2012.
- Douwes, J., Thorne, P., Pearce, N., and Heederik, D.: Bioaerosol Health Effects and  
828 Exposure Assessment: Progress and Prospects, *Ann. Occup. Hyg.*, 47, 187–200,  
<https://doi.org/10.1093/annhyg/meg032>, 2003.
- 830 Eduard, W., Heederik, D., Duchaine, C., and Green, B. J.: Bioaerosol exposure  
assessment in the workplace: the past, present and recent advances, *J. Environ.*  
832 *Monit.*, 14, 334, <https://doi.org/10.1039/c2em10717a>, 2012.
- Elbert, W., Taylor, P. E., Andreae, M. O., and Pöschl, U.: Contribution of fungi to  
834 primary biogenic aerosols in the atmosphere: wet and dry discharged spores,  
carbohydrates, and inorganic ions, *Atmospheric Chem. Phys.*, 7, 4569–4588,  
836 <https://doi.org/10.5194/acp-7-4569-2007>, 2007.
- Favez, O., El Haddad, I., Piot, C., Boréave, A., Abidi, E., Marchand, N., Jaffrezo, J.-L.,  
838 Besombes, J.-L., Personnaz, M.-B., Sciare, J., Wortham, H., George, C., and D'Anna,  
B.: Inter-comparison of source apportionment models for the estimation of wood  
840 burning aerosols during wintertime in an Alpine city (Grenoble, France), *Atmospheric*  
*Chem. Phys.*, 10, 5295–5314, <https://doi.org/10.5194/acp-10-5295-2010>, 2010.
- 842 Favez, O., Weber, S., Petit, J.-E., Alleman, L. Y., Albinet, A., Riffault, V., Chazeau, B.,  
Amodeo, T., Salameh, D., Zhang, Y., Srivastava, D., Samaké, A., Aujay-Plouzeau, R.,  
844 Papin, A., Bonnaire, N., Boullanger, C., Chatain, M., Chevrier, F., Detournay, A.,  
Dominik-Sègue, M., Falhun, R., Garbin, C., Gherzi, V., Grignon, G., Levigoureux, G.,  
846 Pontet, S., Rangognio, J., Zhang, S., Besombes, J.-L., Conil, S., Uzu, G., Savarino, J.,  
Marchand, N., Gros, V., Marchand, C., Jaffrezo, J.-L., and Leoz-Garziandia, E.:  
848 Overview of the French Operational Network for In Situ Observation of PM Chemical  
Composition and Sources in Urban Environments (CARA Program), *Atmosphere*, 12,  
850 207, <https://doi.org/10.3390/atmos12020207>, 2021.
- Fountoukis, C. and Nenes, A.: ISORROPIA II: a computationally efficient  
852 thermodynamic equilibrium model for  $K^+$ – $Ca^{2+}$ – $Mg^{2+}$ – $NH_4^+$  – $Na^+$ – $SO_4^{2-}$ – $NO_3^-$  –  
 $Cl^-$ – $H_2O$  aerosols, *Atmos Chem Phys*, 2007.
- 854 Fröhlich-Nowoisky, J., Kampf, C. J., Weber, B., Huffman, J. A., Pöhlker, C., Andreae,  
M. O., Lang-Yona, N., Burrows, S. M., Gunthe, S. S., Elbert, W., Su, H., Hoor, P.,  
856 Thines, E., Hoffmann, T., Després, V. R., and Pöschl, U.: Bioaerosols in the Earth

- 858 system: Climate, health, and ecosystem interactions, *Atmospheric Res.*, 182, 346–  
376, <https://doi.org/10.1016/j.atmosres.2016.07.018>, 2016.
- 860 Fu, P. Q., Kawamura, K., Chen, J., Charrière, B., and Sempéré, R.: Organic molecular  
composition of marine aerosols over the Arctic Ocean in summer: contributions of  
862 primary emission and secondary aerosol formation, *Biogeosciences*, 10, 653–667,  
<https://doi.org/10.5194/bg-10-653-2013>, 2013.
- 864 Ghosh, B., Lal, H., and Srivastava, A.: Review of bioaerosols in indoor environment  
with special reference to sampling, analysis and control mechanisms, *Environ. Int.*, 85,  
254–272, <https://doi.org/10.1016/j.envint.2015.09.018>, 2015.
- 866 Gosselin, M. I., Rathnayake, C. M., Crawford, I., Pöhlker, C., Fröhlich-Nowoisky, J.,  
Schmer, B., Després, V. R., Engling, G., Gallagher, M., Stone, E., Pöschl, U., and  
868 Huffman, J. A.: Fluorescent bioaerosol particle, molecular tracer, and fungal spore  
concentrations during dry and rainy periods in a semi-arid forest, *Atmospheric Chem.*  
870 *Phys.*, 16, 15165–15184, <https://doi.org/10.5194/acp-16-15165-2016>, 2016.
- 872 Groisillier, A., Labourel, A., Michel, G., and Tonon, T.: The Mannitol Utilization System  
of the Marine Bacterium *Zobellia galactanivorans*, *Appl. Environ. Microbiol.*, 81, 1799–  
1812, <https://doi.org/10.1128/AEM.02808-14>, 2015.
- 874 Guenther, A. B., Jiang, X., Heald, C. L., Sakulyanontvittaya, T., Duhl, T., Emmons, L.  
K., and Wang, X.: The Model of Emissions of Gases and Aerosols from Nature version  
876 2.1 (MEGAN2.1): an extended and updated framework for modeling biogenic  
emissions, *Geosci. Model Dev.*, 5, 1471–1492, <https://doi.org/10.5194/gmd-5-1471-2012>,  
878 2012.
- 880 Heald, C. L. and Spracklen, D. V.: Atmospheric budget of primary biological aerosol  
particles from fungal spores, *Geophys. Res. Lett.*, 36, 2009GL037493,  
<https://doi.org/10.1029/2009GL037493>, 2009.
- 882 Hoose, C., Kristjánsson, J. E., and Burrows, S. M.: How important is biological ice  
nucleation in clouds on a global scale?, *Environ. Res. Lett.*, 5, 024009,  
884 <https://doi.org/10.1088/1748-9326/5/2/024009>, 2010.
- 886 Hopke, P. K., Dai, Q., Li, L., and Feng, Y.: Global review of recent source  
apportionments for airborne particulate matter, *Sci. Total Environ.*, 740, 140091,  
<https://doi.org/10.1016/j.scitotenv.2020.140091>, 2020.
- 888 Huffman, J. A., Prenni, A. J., DeMott, P. J., Pöhlker, C., Mason, R. H., Robinson, N.  
H., Fröhlich-Nowoisky, J., Tobo, Y., Després, V. R., Garcia, E., Gochis, D. J., Harris,  
890 E., Müller-Germann, I., Ruzene, C., Schmer, B., Sinha, B., Day, D. A., Andreae, M. O.,  
Jimenez, J. L., Gallagher, M., Kreidenweis, S. M., Bertram, A. K., and Pöschl, U.: High  
892 concentrations of biological aerosol particles and ice nuclei during and after rain,  
*Atmospheric Chem. Phys.*, 13, 6151–6164, <https://doi.org/10.5194/acp-13-6151-2013>,  
894 2013.
- 896 Hummel, M., Hoose, C., Gallagher, M., Healy, D. A., Huffman, J. A., O'Connor, D.,  
Pöschl, U., Pöhlker, C., Robinson, N. H., Schnaiter, M., Sodeau, J. R., Stengel, M.,  
Toprak, E., and Vogel, H.: Regional-scale simulations of fungal spore aerosols using  
898 an emission parameterization adapted to local measurements of fluorescent biological



- aerosol particles, *Atmospheric Chem. Phys.*, 15, 6127–6146, <https://doi.org/10.5194/acp-15-6127-2015>, 2015.
- 900
- Jaenicke, R., Matthias-Maser, S., and Gruber, S.: Omnipresence of biological material in the atmosphere, *Environ. Chem.*, 4, 217, <https://doi.org/10.1071/EN07021>, 2007.
- 902
- Janssen, R. H. H., Heald, C. L., Steiner, A. L., Perring, A. E., Huffman, J. A., Robinson, E. S., Twohy, C. H., and Ziemba, L. D.: Drivers of the fungal spore bioaerosol budget: observational analysis and global modeling, *Atmospheric Chem. Phys.*, 21, 4381–4401, <https://doi.org/10.5194/acp-21-4381-2021>, 2021.
- 904
- 906
- Jones, A. M. and Harrison, R. M.: The effects of meteorological factors on atmospheric bioaerosol concentrations, a review, *Sci. Total Environ.*, 326, 151–180, <https://doi.org/10.1016/j.scitotenv.2003.11.021>, 2004.
- 908
- Karagulian, F., Belis, C. A., Dora, C. F. C., Prüss-Ustün, A. M., Bonjour, S., Adair-Rohani, H., and Amann, M.: Contributions to cities' ambient particulate matter (PM): A systematic review of local source contributions at global level, *Atmos. Environ.*, 120, 475–483, <https://doi.org/10.1016/j.atmosenv.2015.08.087>, 2015.
- 910
- 912
- 914 Marécal, V., Peuch, V.-H., Andersson, C., Andersson, S., Arteta, J., Beekmann, M., Benedictow, A., Bergström, R., Bessagnet, B., Cansado, A., Chéroux, F., Colette, A., Coman, A., Curier, R. L., Denier Van Der Gon, H. A. C., Drouin, A., Elbern, H., Emili, E., Engelen, R. J., Eskes, H. J., Foret, G., Friese, E., Gauss, M., Giannaros, C., Guth, J., Joly, M., Jaumouillé, E., Josse, B., Kadygrov, N., Kaiser, J. W., Krajsek, K., Kuenen, J., Kumar, U., Liora, N., Lopez, E., Malherbe, L., Martinez, I., Melas, D., Meleux, F., 916 Menut, L., Moinat, P., Morales, T., Parmentier, J., Piacentini, A., Plu, M., Poupkou, A., Queguiner, S., Robertson, L., Rouil, L., Schaap, M., Segers, A., Sofiev, M., Tarasson, L., Thomas, M., Timmermans, R., Valdebenito, A., Van Velthoven, P., Van Versendaal, R., Vira, J., and Ung, A.: A regional air quality forecasting system over Europe: the 920 MACC-II daily ensemble production, *Geosci. Model Dev.*, 8, 2777–2813, <https://doi.org/10.5194/gmd-8-2777-2015>, 2015.
- 924
- 926 Menut, L., Bessagnet, B., Briant, R., Cholakian, A., Couvidat, F., Mailler, S., Pennel, R., Siour, G., Tuccella, P., Turquety, S., and Valari, M.: The CHIMERE v2020r1 online 928 chemistry-transport model, *Geosci. Model Dev.*, 14, 6781–6811, <https://doi.org/10.5194/gmd-14-6781-2021>, 2021.
- 930
- 932 Paatero, P. and Tapper, U.: Positive matrix factorization: A non-negative factor model with optimal utilization of error estimates of data values, *Environmetrics*, 5, 111–126, <https://doi.org/10.1002/env.3170050203>, 1994.
- 934
- 936 Patade, S., Phillips, V. T. J., Amato, P., Bingemer, H. G., Burrows, S. M., DeMott, P. J., Goncalves, F. L. T., Knopf, D. A., Morris, C. E., Alwmark, C., Artaxo, P., Pöhlker, C., Schrod, J., and Weber, B.: Empirical formulation for multiple groups of primary biological ice nucleating particles from field observations over Amazonia, *J. Atmospheric Sci.*, 78, 2195–2220, <https://doi.org/10.1175/JAS-D-20-0096.1>, 2021.
- 938
- 940 Pearson, C., Littlewood, E., Douglas, P., Robertson, S., Gant, T. W., and Hansell, A. L.: Exposures and Health Outcomes in Relation to Bioaerosol Emissions From Composting Facilities: A Systematic Review of Occupational and Community Studies,

- J. Toxicol. Environ. Health Part B, 18, 43–69,  
942 <https://doi.org/10.1080/10937404.2015.1009961>, 2015.
- Petit, J.-E., Favez, O., Sciare, J., Crenn, V., Sarda-Estève, R., Bonnaire, N., Močnik,  
944 G., Dupont, J.-C., Haeffelin, M., and Leoz-Garziandia, E.: Two years of near real-time  
946 chemical composition of submicron aerosols in the region of Paris using an Aerosol  
948 Chemical Speciation Monitor (ACSM) and a multi-wavelength Aethalometer,  
Atmospheric Chem. Phys., 15, 2985–3005, <https://doi.org/10.5194/acp-15-2985-2015>,  
2015.
- Rouil, L., Honoré, C., Vautard, R., Beekmann, M., Bessagnet, B., Malherbe, L.,  
950 Meleux, F., Dufour, A., Elichegaray, C., Flaud, J.-M., Menut, L., Martin, D., Peuch, A.,  
952 Peuch, V.-H., and Poisson, N.: Prev'air: An Operational Forecasting and Mapping  
System for Air Quality in Europe, Bull. Am. Meteorol. Soc., 90, 73–84,  
<https://doi.org/10.1175/2008BAMS2390.1>, 2009.
- 954 Samaké, A., Uzu, G., Martins, J. M. F., Calas, A., Vince, E., Parat, S., and Jaffrezo, J.  
956 L.: The unexpected role of bioaerosols in the Oxidative Potential of PM, Sci. Rep., 7,  
10978, <https://doi.org/10.1038/s41598-017-11178-0>, 2017.
- Samaké, A., Jaffrezo, J.-L., Favez, O., Weber, S., Jacob, V., Canete, T., Albinet, A.,  
958 Charron, A., Riffault, V., Perdrix, E., Waked, A., Golly, B., Salameh, D., Chevrier, F.,  
960 Oliveira, D. M., Besombes, J.-L., Martins, J. M. F., Bonnaire, N., Conil, S., Guillaud,  
962 G., Mesbah, B., Rocq, B., Robic, P.-Y., Hulin, A., Le Meur, S., Descheemaeker, M.,  
964 Chretien, E., Marchand, N., and Uzu, G.: Arabitol, mannitol, and glucose as tracers of  
primary biogenic organic aerosol: the influence of environmental factors on ambient air  
concentrations and spatial distribution over France, Atmospheric Chem. Phys., 19,  
11013–11030, <https://doi.org/10.5194/acp-19-11013-2019>, 2019a.
- Samaké, A., Jaffrezo, J.-L., Favez, O., Weber, S., Jacob, V., Albinet, A., Riffault, V.,  
966 Perdrix, E., Waked, A., Golly, B., Salameh, D., Chevrier, F., Oliveira, D. M., Bonnaire,  
968 N., Besombes, J.-L., Martins, J. M. F., Conil, S., Guillaud, G., Mesbah, B., Rocq, B.,  
970 Robic, P.-Y., Hulin, A., Le Meur, S., Descheemaeker, M., Chretien, E., Marchand, N.,  
and Uzu, G.: Polyols and glucose particulate species as tracers of primary biogenic  
organic aerosols at 28 French sites, Atmospheric Chem. Phys., 19, 3357–3374,  
<https://doi.org/10.5194/acp-19-3357-2019>, 2019b.
- 972 Samaké, A., Bonin, A., Jaffrezo, J.-L., Taberlet, P., Weber, S., Uzu, G., Jacob, V.,  
974 Conil, S., and Martins, J. M. F.: High levels of primary biogenic organic aerosols are  
driven by only a few plant-associated microbial taxa, Atmospheric Chem. Phys., 20,  
5609–5628, <https://doi.org/10.5194/acp-20-5609-2020>, 2020.
- 976 Shaffer, B. T. and Lighthart, B.: Survey of Culturable Airborne Bacteria at Four Diverse  
978 Locations in Oregon: Urban, Rural, Forest, and Coastal, Microb. Ecol., 34, 167–177,  
<https://doi.org/10.1007/s002489900046>, 1997.
- Sindelarova, K., Granier, C., Bouarar, I., Guenther, A., Tilmes, S., Stavrou, T.,  
980 Müller, J.-F., Kuhn, U., Stefani, P., and Knorr, W.: Global data set of biogenic VOC  
982 emissions calculated by the MEGAN model over the last 30 years, Atmospheric Chem.  
Phys., 14, 9317–9341, <https://doi.org/10.5194/acp-14-9317-2014>, 2014.

- 984 Skamarock, W. C., Klemp, J. B., Dudhia, J., Gill, D. O., Barker, D. M., Duda, M. G.,  
Huang, X.-Y., Wang, W., and Powers, J. G.: A Description of the Advanced Research  
986 WRF Version 3, National Center for Atmospheric Research Boulder, Colorado, USA,  
2008.
- 988 Verlhac, S., Favez, O., and Albinet, A.: Interlaboratory comparison organized for the  
European laboratories involved in the analysis of levoglucosan and its isomers,  
LCSQA, Verneuil-en-Halatte, 2013.
- 990 Vestreng, V.: Review and Revision, Emission Data Reported to CLRTAP, MSC-W  
Status Report, Norwegian Meteorological Institute, Oslo, Norway, 2003.
- 992 Von Storch, H., Langenberg, H., and Feser, F.: A Spectral Nudging Technique for  
Dynamical Downscaling Purposes, *Mon. Weather Rev.*, 128, 3664–3673,  
994 [https://doi.org/10.1175/1520-0493\(2000\)128<3664:ASNTFD>2.0.CO;2](https://doi.org/10.1175/1520-0493(2000)128<3664:ASNTFD>2.0.CO;2), 2000.
- 996 Waked, A., Favez, O., Alleman, L. Y., Piot, C., Petit, J.-E., Delaunay, T., Verlinden, E.,  
Golly, B., Besombes, J.-L., Jaffrezo, J.-L., and Leoz-Garziandia, E.: Source  
998 apportionment of PM<sub>10</sub> in a north-western Europe regional urban background site  
(Lens, France) using positive matrix factorization and including primary biogenic  
1000 emissions, *Atmospheric Chem. Phys.*, 14, 3325–3346, <https://doi.org/10.5194/acp-14-3325-2014>, 2014.
- 1002 Weber, S., Uzu, G., Favez, O., Borlaza, L. J., Calas, A., Salameh, D., Chevrier, F.,  
Allard, J., Besombes, J.-L., Albinet, A., Pontet, S., Mesbah, B., Gille, G., Zhang, S.,  
1004 Pallares, C., Leoz-Garziandia, E., and Jaffrezo, J.-L.: Source apportionment of  
atmospheric PM<sub>10</sub> Oxidative Potential: synthesis of 15 year-round urban datasets in  
1006 France, *Atmospheric Chem. Phys.*, 21, 11353–11378, <https://doi.org/10.5194/acp-21-11353-2021>, 2021.
- 1008 Yttri, K. E., Schnelle-Kreis, J., Maenhaut, W., Abbaszade, G., Alves, C., Bjerke, A.,  
Bonnier, N., Bossi, R., Claeys, M., Dye, C., Evtyugina, M., García-Gacio, D., Hillamo,  
1010 R., Hoffer, A., Hyder, M., Iinuma, Y., Jaffrezo, J.-L., Kasper-Giebl, A., Kiss, G., López-  
Mahia, P. L., Pio, C., Piot, C., Ramirez-Santa-Cruz, C., Sciare, J., Teinilä, K.,  
1012 Vermeylen, R., Vicente, A., and Zimmermann, R.: An intercomparison study of  
analytical methods used for quantification of levoglucosan in ambient aerosol filter  
1014 samples, *Atmospheric Meas. Tech.*, 8, 125–147, <https://doi.org/10.5194/amt-8-125-2015>, 2015.
- 1016
